# Supplementary material
Source: Elsevier journal article supplement (http://darchive.mblwhoilibrary.org/bitstream/handle/1912/7237/mmc1.docx)
Supplement: mmc1 [file mmc1.docx]

**Supplemental Information for “Regional to global assessments of phytoplankton dynamics from the SeaWiFS mission” by D.A. Siegel and others.**

***Satellite Ocean Color Data Processing:***

Ocean color sensors are designed to measure the spectral distribution of visible radiation upwelling from beneath the ocean surface. This water-leaving radiance, Lw(λ), is solar radiation that penetrated the ocean surface, interacted with the water column, and was scattered upward by water molecules and other constituents back through the sea-air interface. Spaceborne sensors such as SeaWiFS, however, actually measure the spectral radiance exiting the top of the atmosphere (TOA) in the visible to near infrared regime. The SeaWiFS sensor measured TOA radiance in six ocean color measurement bands centered at 412, 443, 490, 510, 555 and 670 nm and in two atmospheric correction bands centered at 765 and 865nm. The majority of observed TOA radiance is light reflected by air molecules and aerosols within the atmosphere or light reflected from the ocean surface that never penetrated the air-sea interface, and those contributions must be accurately modeled and removed from the observed signal to retrieve the water-leaving radiance. This process is referred to as atmospheric correction.

The SeaWiFS atmospheric correction approach is based on the work of Gordon and Wang (1994), but with a number of updates and refinements that were incorporated in various reprocessing events (<http://oceancolor.gsfc.nasa.gov/REPROCESSING>). The observed TOA spectral radiances are first corrected for atmospheric gas absorption, including effects of ozone, oxygen, and water vapor (Gordon, 1995), and nitrogen dioxide (Ahmad et al., 2007). Surface contributions are then subtracted, including effects of white caps and foam (Gordon & Wang, 1994b; Frouin et al., 1997; Moore et al., 2000), and sun glint, the specular reflection of the sun on the sea surface (Cox & Munk, 1954; Wang & Bailey, 2001). Next, the light scattered by air molecules, Rayleigh scattering, is subtracted. The Rayleigh scattering contribution is generally the largest component of the TOA signal, accounting for approximately 80 - 95% of the radiance in the visible regime. Fortunately, this contribution can be accurately modeled through vector radiative transfer simulations (Ahmad & Fraser, 1982) that account for multiple scattering, polarization, and the full spectral bandpass of each SeaWiFS band. The remaining signal is due to water-leaving radiances and light scattered by aerosols (including Rayleigh-aerosol interactions; Gordon & Wang, 1994).

The contribution from aerosols is estimated based on the signal in the near infrared: a spectral range where water contributions are small and can be assumed negligible or accurately estimated through bio-optical modeling (Bailey et al., 2010). Following Gordon & Wang (1994), the estimated aerosol signal in the two SeaWiFS NIR bands at 765 and 865nm are used to select an aerosol type from a look-up table of models derived through vector radiative transfer simulations (Ahmad et al., 2010). Given the aerosol model and the estimated aerosol signal at 865nm, the aerosol contribution in the visible wavelengths can be estimated and removed, leaving the contribution of the TOA signal associated with the water-leaving radiances. This water-leaving signal is then corrected for atmospheric diffuse attenuation (Wang, 1999) to produce the water-leaving radiances just above the sea surface.

The final step is to normalize the water-leaving radiances to an overhead Sun at 1AU distance and a non-attenuating atmosphere (Gordon, 1981), and to adjust for bi-directional effects including Fresnel reflection and refraction at the air to sea and sea to air interface (Gordon, 2005; Wang, 2006), and inhomogeneity of the subsurface light field (Morel et al., 2002). The end result is the normalized water-leaving radiances, which can be divided by the mean extraterrestrial solar irradiances in each band to form the Remote Sensing Reflectances (Rrs).

***SeaWiFS Calibration and Radiometric Uncertainty:***

Given that the water-leaving radiances contribute only about 10% of the TOA radiance observed at 443nm over open oceans, a radiometric accuracy of 0.5% is needed to reach the SeaWiFS mission maximum uncertainty goal of 5% in water-leaving radiance at 443nm in blue water. This was achieved through a comprehensive prelaunch characterization of the instrument radiometric response (Barnes et al., 1994a, 1994b), continuous monitoring and correction for sensor degradation on-orbit using monthly observations of the moon (Eplee at al., 2011), and a vicarious calibration to a well-calibrated ground target to remove any residual bias in the sensor calibration or atmospheric correction (Franz et al., 2007).

The prelaunch characterization of SeaWiFS was thorough (Barnes et al., 1994a, 1994b). The testing and analysis established the relationship between the digital detector counts and the observed radiance, and the sensitivity of those radiometric gains to focal-plane temperature. The testing also demonstrated the very low polarization sensitivity, and revealed significant but correctable out-of-band spectral response (Gordon, 1997). Prelaunch analysis verified that SeaWiFS met the signal-to-noise (SNR) specifications, ranging from 1000:1 at 490 nm to 360:1 at 865 nm.

To ensure radiometric stability over time, SeaWiFS utilized monthly observations of the moon at approximately a 7° phase angle to track and correct for degradation in radiometric response in each sensor band. The methodology quantified the spectral degradation to within 0.1% (all bands) over the mission lifetime, and showed a gradual loss of sensitivity in all bands with the NIR bands having the greatest decrease (~22% at 865 nm, Eplee et al., 2011).

Once the sensor degradation was removed, a mission-averaged vicarious adjustment in the sensor calibration from the pre-launch calibration was applied to account for residual biases in the “sensor-atmosphere system” (Evans and Gordon, 1994). For SeaWiFS, observations from the Marine Optical Buoy (MOBY; Clark et al., 1997) were used. Using MOBY observations of water-leaving radiance in the visible regime, the TOA radiances were modeled by reversing the atmospheric correction (Franz et al., 2007). The SeaWiFS calibration gain factors were then adjusted to minimize the difference between the observed and modeled TOA radiances. Franz et al. showed that 30-40 high quality MOBY-SeaWiFS match-up sets were required to achieve convergence in the gain factors. The adjustments ranged from 0.2 to 2.2% (most recent reprocessing). In the NIR, it was assumed that the 865 nm gains were accurate and the 765 nm gain was adjusted to force the average aerosol-type retrieval over the South Pacific Gyre to match typical AERONET observations at Tahiti.

The determination of uncertainty in SeaWiFS ocean color radiometry must consider three independent sources; 1) uncertainty in the calibration trends in time, 2) uncertainty in the MOBY calibration and its determinations of water-leaving radiance and 3) uncertainty in the estimation of SeaWiFS calibration gain corrections.  As noted, uncertainty in the estimation of SeaWiFS calibration over time has been estimated as ~0.1% in all bands, based on the lunar calibration analysis. Uncertainties in the MOBY water-leaving radiances (Lw(λ)) involve both the MOBY spectrometer calibration and the propagation of the subsurface radiances through the water column and the air-sea interface.  Brown et al. (2007; Table 5) provide the contribution of each to the Lw(λ) error budget, with the total uncertainty in Lw(λ) ranging from 2.1 to 3.3% depending on the spectral band.  The Lw(λ) contribution to the top of the atmosphere radiance is typically 10% for oligotrophic waters and clear atmospheres, which are typically found where MOBY has been deployed. Thus the Lw(λ) uncertainty is equivalent to 0.21 to 0.33% at the top of the atmosphere.  Third, uncertainties in the vicarious calibration gain factors for individual time points were often large (~1%; Franz et al. 2007) and are primarily due to uncertainty in the atmospheric corrections (Gordon, 1997; Ahmad et al., 2010).  After evaluating over many (>30) independent estimates, the uncertainty in the mean gains (standard errors about the mean) are ~0.1% (Table 1 in Franz et al. 2007).   Assuming independence among these three sources of uncertainty, the result is an overall uncertainty on TOA radiance of ~0.3% (all bands).

***Application and Validation of the Band-ratio Ocean Color Algorithm*:**

The ‘standard’ SeaWiFS chlorophyll product is based on an empirical, maximal band-ratio algorithm (O’Reilly et al. 1998) using SeaWiFS remote sensing reflectance measurements at 443, 490, 510 and 555 nm as inputs. The algorithm empirically relates the maximum of three band-ratios of remote sensing reflectance pairs of 443/555, 490/555 and 510/555 to the chlorophyll concentration (http://oceancolor.gsfc.nasa.gov/REPROCESSING/R2009/ocv6/). For low chlorophyll waters, the blue/green ratio will be the maximum ratio used; whereas for eutrophic waters the 510/555 ratios will be selected. Based on comparison with a large (>2000) *in-situ* match-up data set, the SeaWiFS band ratio chlorophyll algorithm retrievals (ChlBR) show an absolute difference of ~36% (over all water types) for over three orders of concentration magnitude (updated from Bailey and Werdell, 2006)

***Application of the GSM Ocean Color Model:***

The GSM Ocean Color model is a semi-analytical spectral expression that accounts for the major optically active components controlling the remote sensing reflectance signal. When used with offshore, non-polar in situ measurements the model performance for the Chl retrievals is equivalent to that of the operational SeaWiFS algorithm (see figure 4a and 4b in Maritorena et al., 2002 and the results in Table 1 of this paper). Because the GSM model uses all the available bands in the visible and it is not a ratio based approach, it is more sensitive to noise in the reflectance data than band-ratio based algorithms. Satellite spectral reflectance data are generally noisier than in situ measurements, particularly in areas where atmospheric correction is problematic. This can affect the quality of some retrievals but overall, when compared to in situ measurements, the GSM model performs well in non-polar, non-coastal waters Maritorena and Siegel, 2005; Maritorena et al. 2010).

***Interpretation of the CDM Product:***

The GSM ocean color algorithm decomposes the absorption contribution to remote sensing reflectance into a phytoplankton component that is parameterized by chlorophyll and a component that is the combined absorption of CDOM and particulate non-phytoplankton material (detritus), called CDM. The GSM algorithm cannot, at this time, discriminate between CDOM and non-phytoplankton particulate (detrital) absorption because they both have largely featureless spectra, decreasing with wavelength. However, the relative contribution of detrital absorption is small relative to CDOM in the blue wavelength region. An analysis of bottle-sample component absorption in the Sargasso Sea (Nelson et al. 1998) and in a global-scale study with samples from the North Atlantic, North, Equatorial, and South Pacific, and Southern Oceans (Nelson et al. 2007; 2010; Swan et al. 2009; Nelson and Siegel, 2013) indicate that the absorption coefficient of detrital materials at 443 nm (assessed using the methanol-extraction technique on filter pads) is a small fraction of the CDM absorption in the open ocean. The mean value for the ratio of the detrital particulate absorption coefficient at 443 nm to CDM from the global, open ocean, in situ data shown in Figure 1 of the main text is 16.5% (std. dev. = 13.1%; N=371). Hence variations in retrieved CDM values will be largely due to changes in the CDOM concentration. Further because detrital spectral absorption does not slope as sharply as CDOM absorption, the relative contribution of detritus to CDM absorption is less at shorter wavelengths, and is slightly greater at longer wavelengths.

***Interpretation of the BBP Product:***

The particulate backscattering coefficient (BBP) can be related to phytoplankton carbon biomass. However, several independent constraints must be used to demonstrate this, as there are no sufficient analytical measurements of phytoplankton biomass in the ocean to derive direct empirical relationships. A related optical property, the particulate beam attenuation coefficient (cp), is most sensitive to particles in the size range ~0.5-20 µm (Stramski and Kiefer, 1991), a window which overlaps most phytoplankton found in the ocean. Changes in cp have repeatedly been shown to track phytoplankton growth and abundance over diel cycles (Siegel et al., 1989; Durand and Olson, 1996; Green et al., 2003) and further, chlorophyll normalized cp (cp:Chl) is strongly correlated with phytoplankton photosynthetic indices (Behrenfeld and Boss, 2003; 2006). Thus, there is a strong body of evidence linking cp and phytoplankton biomass. More recently, it has been demonstrated that the relationship between cp and BBP appears to be well constrained (Dall’Olmo et al. 2009: Westberry et al., 2010; Antoine et al., 2011). Taken together, these findings suggest that we can use BBP as a proxy for cp in the above relationships.

Conversion of BBP to phytoplankton biomass is carried out such that the resulting carbon biomass is a reasonable fraction (~25-40%) of total particulate carbon (e.g., Eppley et al., 1992; Gunderson et al., 2001) and ratios of phytoplankton chlorophyll to carbon biomass are within the range observed in laboratory studies (Behrenfeld et al., 2005). Application of these biomass estimates from satellite ocean color data show temporal patterns of photoacclimation consistent with that measured in the field (Westberry et al., 2008) and subsequent incorporation into a global net primary productivity model yields patterns and rates that are broadly consistent with other global estimates, as well as field measurements. Thus, without more direct validation available, it appears that the conversion of BBP to phytoplankton biomass is a reasonable approach.

**Supplemental Information Section References:**

Ahmad, Z., and R. S. Fraser, 1982: An iterative radiative transfer code for ocean-atmosphere systems, J. Atmos. Sci, 39, 656-665.

Ahmad, Z., B.A. Franz, C.R. McClain, E.J. Kwiatkowska, J. Werdell, E.P. Shettle, and B.N. Holben, 2010: New aerosol models for the retrieval of aerosol optical thickness and normalized water-leaving radiances from the SeaWiFS and MODIS sensors over coastal regions and Open Oceans, *Appl. Opt.*, **49**, 5545-5560.

Ahmad, Z., C. R. McClain, J. R. Herman, B. A. Franz, E. J. Kwiatkowska, W. D. Robinson, E. J. Buscela, and M. Tzortziou, 2007: Atmospheric correction for NO2 absorption in retrieving water-leaving reflectances from SeaWiFS and MODIS measurements, *Appl. Opt.*, **46**, 6504-6512.

Antoine, D., D.A. Siegel, T. Kostadinov, S. Maritorena, N.B. Nelson, B. Gentili, V. Vellucci and N. Guillocheau, 2011: Variability in optical particle backscattering in contrasting bio-optical oceanic regimes, *Limnology and Oceanography*, **56**, 955–973.

Bailey, S. W. and P. J. Werdell, 2006: A multi-sensor approach for the on-orbit validation of ocean color satellite data products, *Remote Sensing of the Environment*, **102**, 12-23.

Bailey, S. W., B. A. Franz, and P. J. Werdell, 2010: Estimation of near-infrared water-leaving reflectance for satellite ocean color data processing, *Optics Express*, **18**, 7521-7527.

Barnes, R. A., W. L. Barnes, W. E. Esaias and C. R. McClain, 1994a: Prelaunch Acceptance Report for the SeaWiFS Radiometer, NASA Tech. Memo. 104566, Vol. 22, S. B. Hooker, E. R. Firestone and J. G. Acker (eds.), NASA Goddard Space Flight Center, Greenbelt, Maryland, 32 pp.

Barnes, R. A., A. W. Holmes, W. L. Barnes, W. E. Esaias and C. R. McClain, 1994b: SeaWiFS Prelaunch Radiometric Calibration and Spectral Characterization, NASA Tech. Memo. 104566, Vol. 23, S. B. Hooker, E. R. Firestone and J. G. Acker (eds.), NASA Goddard Space Flight Center, Greenbelt, Maryland, 55 pp.

Behrenfeld, M. J., and E. Boss 2003: The beam attenuation to chlorophyll ratio: an optical index of phytoplankton photoacclimation in the surface ocean?, *Deep Sea Res., Part I*, **50**, 1537-1549.

Behrenfeld, M. J., and E. Boss 2006: Beam attenuation to chlorophyll concentration as alternative indices of phytoplankton biomass, *J. Mar. Res.*, **64**, 431 – 451.

Behrenfeld, M.J., E. Boss, D.A. Siegel and D.M. Shea, 2005, Carbon-based ocean productivity and phytoplankton physiology from space. *Global Biogeochemical Cycles*, **19**, DOI:10.1029/2004GB002299.

Brown, S.W., S.J. Flora, M.E. Feinholz, M.A. Yarbrough, T. Houlihan, D. Peters, Y.S. Kim, J. Mueller, B.C. Johnson, D.K. Clark, 2007: The Marine Optical Buoy (MOBY) radiometric calibration and uncertainty budget for ocean color satellite vicarious calibration. Proc. SPIE Optics and Photonics; Sensors, Systems, and Next-Generation Satellites XI. 6744, doi:10.1117/12.737400.

Campbell, J.W., 1995: The lognormal distribution as a model for bio-optical variability in the sea. *Journal of Geophysical Research*, **100**, 13237-13254.

Clark, D.K., H. R. Gordon, K. J. Voss, Y. Ge, W. W. Broenkow, and C. Trees, 1997: Validation of atmospheric correction over the oceans, *J. Geophys. Res*. **102**, 17209–17217.

Cox, C., and W. Munk, 1954: Measurements of the roughness of the sea surface from photographs of the sun’s glitter, *J. Opt. Soc. Am*. **44**, 838 – 850.

Dall’Olmo, G., T.K. Westberry, M.J. Behrenfeld, E. Boss, W.H. Slade, 2009: Significant contribution of large particles to optical backscattering in the open ocean. *Biogeosciences*, **6**, 947–967.

DuRand, M.D. and R.J. Olson. 1996. Contributions of phytoplankton light scattering and cell concentration changes to diel variations in beam attenuation in the equatorial Pacific from flow cytometric measurements of pico-, ultra-, and nanoplankton. *Deep-Sea Research II*, **43**, 891-906.

Eplee, R.E.Jr., G. Meister, F.S. Patt, B.A. Franz, and C.R. McClain, 2011: Uncertainty assessment of the SeaWiFS on-orbit calibration, in Earth Observing Systems XVI, J.J. Butler, X. Xiong, and X. Gu, eds., *Proc. SPIE* **8153**, 815310.

Eppley, R. W., F. P. Chavez, and R. T. Barber, 1992, Standing stocks of particulate carbon and nitrogen in the equatorial Pacific at 150W. *J. Geophys. Res.*, **97**, 655– 661.

Evans, R. H. and H. R. Gordon, 1994: Coastal zone color scanner “system calibration”: A retrospective examination *Journal of Geophysical Research*, **99**, 7293-7307.

Franz, B.A., S.W. Bailey, P.J. Werdell, and C.R. McClain, 2007. Sensor-independent approach to vicarious calibration of satellite ocean color radiometry, *Applied Optics,* **46**,5068-5082.

Frouin, R., M. Schwindling, and P. Y. Dechamps, 1997: Spectral reflectance of sea foam in the visible and near infrared: In situ measurements and remote sensing implications,” *Journal of Geophysical Research* **101**, 14,361–14,371.

Gordon, H. R., 2005: Normalized water-leaving radiance: revisiting the influence of surface roughness, *Applied Optics*, **44**, 241–248.

Gordon, H. R., 1995: Remote sensing of ocean color: a methodology for dealing with broad spectral bands and significant out-of-band response, *Applied Optics*, **34**, 8363–8374.

Gordon, H.R., 1981: Clear water radiances for atmospheric correction of coastal zone color scanner imagery, *Applied Optics*, **20**, 4175–4180.

Gordon, H. R. and M. Wang, 1994a: Retrieval of water-leaving radiance and aerosol optical thickness over the oceans with SeaWiFS: a preliminary algorithm, *Applied Optics*, **33**, 443-452.

Gordon H. R., and M. Wang, 1994b: Influence of oceanic whitecaps on atmospheric correction of SeaWiFS, *Applied Optics*, **33**, 7754–7763.

Gordon, H. R., T. Du, and T. Zhang, 1997: Atmospheric correction of ocean color sensors: analysis of the effects of residual instrument polarization sensitivity, *Applied Optics*, **36**, 6938 – 6948.

Green, R.E., H.M. Sosik, R.J. Olson and M.D. DuRand. 2003. Flow cytometric determination of size and complex refractive index for marine particles: comparison with independent and bulk estimates. *Applied Optics*, **42**, 526-541.

Gundersen, K., K. M. Orcutt, D. A. Purdie, A. F. Michaels, and A. H. Knap, 2001, Particulate organic carbon mass distribution at the Bermuda Atlantic time-series Study (BATS) site, *Deep Sea Res., Part II*, **48**, 1697–1718.

Maritorena, S., and D.A. Siegel, 2005: Consistent merging of satellite ocean color data using a semi-analytical model, *Remote Sensing of the Environment*, **94**, 429-440.

Maritorena, S., D.A. Siegel and A.R. Peterson, 2002: Optimization of a semianalytical ocean color model for global-scale applications. *Applied Optics-LP*, **41**, 2705-2714.

Maritorena, S., O. H. Fanton d'Andon, A. Mangin and D.A. Siegel, 2010: Merged satellite ocean color data products using a bio-optical model: characteristics, benefits and issues. *Remote Sensing of the Environment*, **114**, 1791-1804.

Morel, A., D. Antoine, and B. Gentilli, 2002: Bidirectional reflectance of oceanic waters: accounting for Ramen emission and varying particle scattering phase function, *Applied Optics*, **41**, 6289–6306.

Morel, A., Huot, Y., Gentili, B., Werdell, P.J., Hooker, S.B. and B.A. Franz, 2007. Examining the consistency of products derived from various ocean color sensors in open ocean (Case 1) waters in the perspective of a multi-sensor approach. *Remote Sensing of Environment*, **111**, 69-88.

Nelson, N.B., & Siegel D.A., (2013). The global distribution and dynamics of chromophoric dissolved organic matter. *Annual Review of Marine Science*, DOI: 10.1146/annurev-marine-120710-100751.

Nelson, N.B., D.A. Siegel, C.A. Carlson, C. Swan, W.M. Smethie, Jr., and S. Khatiwala, 2007: Hydrography of chromophoric dissolved organic matter in the North Atlantic.  *Deep-Sea Research, Part I*, **54**, 710-731.

Nelson, N.B., D.A. Siegel, and A.F. Michaels, 1998: Seasonal dynamics of colored dissolved material in the Sargasso Sea.  *Deep Sea Research, I*, **45**, 931-957.

O’Reilly, J. E., S. Maritorena, B. G. Mitchell, D. A. Siegel, K. L. Carder, S. A. Garver, M. Kahru, and C. McClain, 1998: Ocean color chlorophyll algorithms for SeaWiFS, *J. Geophys. Res.*, **103**, 24,937-24,953.

Siegel, D.A., T.D. Dickey, L. Washburn, M.K. Hamilton and B.G. Mitchell, 1989: Optical determination of particulate abundance and production variations in the oligotrophic ocean. *Deep-Sea Research*, **36**, 211-222.

Siegel, D.A., S. Maritorena, N.B. Nelson and M.J. Behrenfeld, 2005a: Independence and interdependencies of global ocean color properties; Reassessing the bio-optical assumption. *Journal of Geophysical Research*, **110**, C07011, doi:10.1029/2004JC002527.

Stramski, D., and D. A. Kiefer. 1991: Light scattering by microorganisms in the open ocean. *Progress in Oceanography*, **28**, 343-383.

Swan, C.M., D.A. Siegel, N.B. Nelson, C.A. Carlson and E. Nasir, 2009: Biogeochemical and hydrographic controls on chromophoric dissolved organic matter distribution in the Pacific Ocean.  *Deep-Sea Research, Part I*, **56**, 2172-2192.

Wang, M., 2006: Effects of ocean surface reflectance variation with solar elevation on normalized water-leaving radiance, *Applied Optics*, **45**, 4122–4128.

Wang, M., 2002: The Rayleigh lookup tables for the SeaWIFS data processing: accounting for the effects of ocean surface roughness, *International Journal of Remote Sensing* **23**, 2693–2702.

Wang, M., 1999: Atmospheric correction of ocean color sensors: Computing atmospheric diffuse transmittance, *Applied Optics*, **38**, 451–455.

Wang, M., and S.W. Bailey, 2001: Correction of Sun glint Contamination on the SeaWiFS Ocean and Atmosphere Products, *Applied Optics*, **40**, 4790-4798.

Wang, M., B.A. Franz, R.A. Barnes, and C.R. McClain, 2001: Effects of spectral bandpass on SeaWiFS-retrieved near-surface optical properties of the ocean, *Applied Optics* **40**, 343–348.

Westberry, T.K., G. Dall’Olmo, E. Boss, M.J. Behrenfeld, and T. Moutin, 2010: Coherence of particulate beam attenuation and backscattering coefficients in diverse open ocean environments. *Optics Express*, **18**, 15419-15425.

Westberry, T.K., M.J. Behrenfeld, D.A. Siegel and E. Boss, 2008: Carbon-based primary productivity modeling with vertically resolved photoacclimation. *Global Biogeochemical Cycles*, **22**, GB2024, doi:10.1029/2007GB003078.
